# Supplementary material
Source: PubMed Central journal article supplement (PMC3929450)

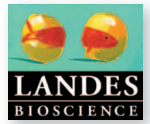

**Supplemental Material to:**

**Ingo Schubert, Domenica Saul, Stefanie  
Nowecki, Andreas Mackensen, George H Fey,  
Fuat Oduncu**

**A dual-targeting triplebody mediates preferential  
redirected lysis of antigen double-positive over single-  
positive leukemic cells**

**2013; 6(1)**

**<http://dx.doi.org/10.4161/mabs.26768>**

**<https://www.landesbioscience.com/journals/mabs/article/26768/>**

**Figure S1. *Ex vivo* expansion of MNCs from a healthy donor.** (A) Total cell numbers of expanded MNCs. After incubation with the OKT3 antibody for the first 5 days, cell numbers were determined every 2 days by staining with trypan-blue and counting of living cells. Data points represent mean cell numbers + SEM, averaged over 6 different expansion experiments. (B) Evolution of subpopulations during the culture period. The data points represent the mean percentage  $\pm$  SEM of 6 experiments. Open triangles: T cells; open inverted triangles: NKT cells; open squares: NK cells. (C) Mean expansion of NK and T cells. After initial seeding of  $10^6$  MNCs/ml, the NK cells were expanded 629-fold, and the T cells 704-fold during 21 days of culture. Data represent the mean  $\pm$  SEM for 6 expansion reactions.

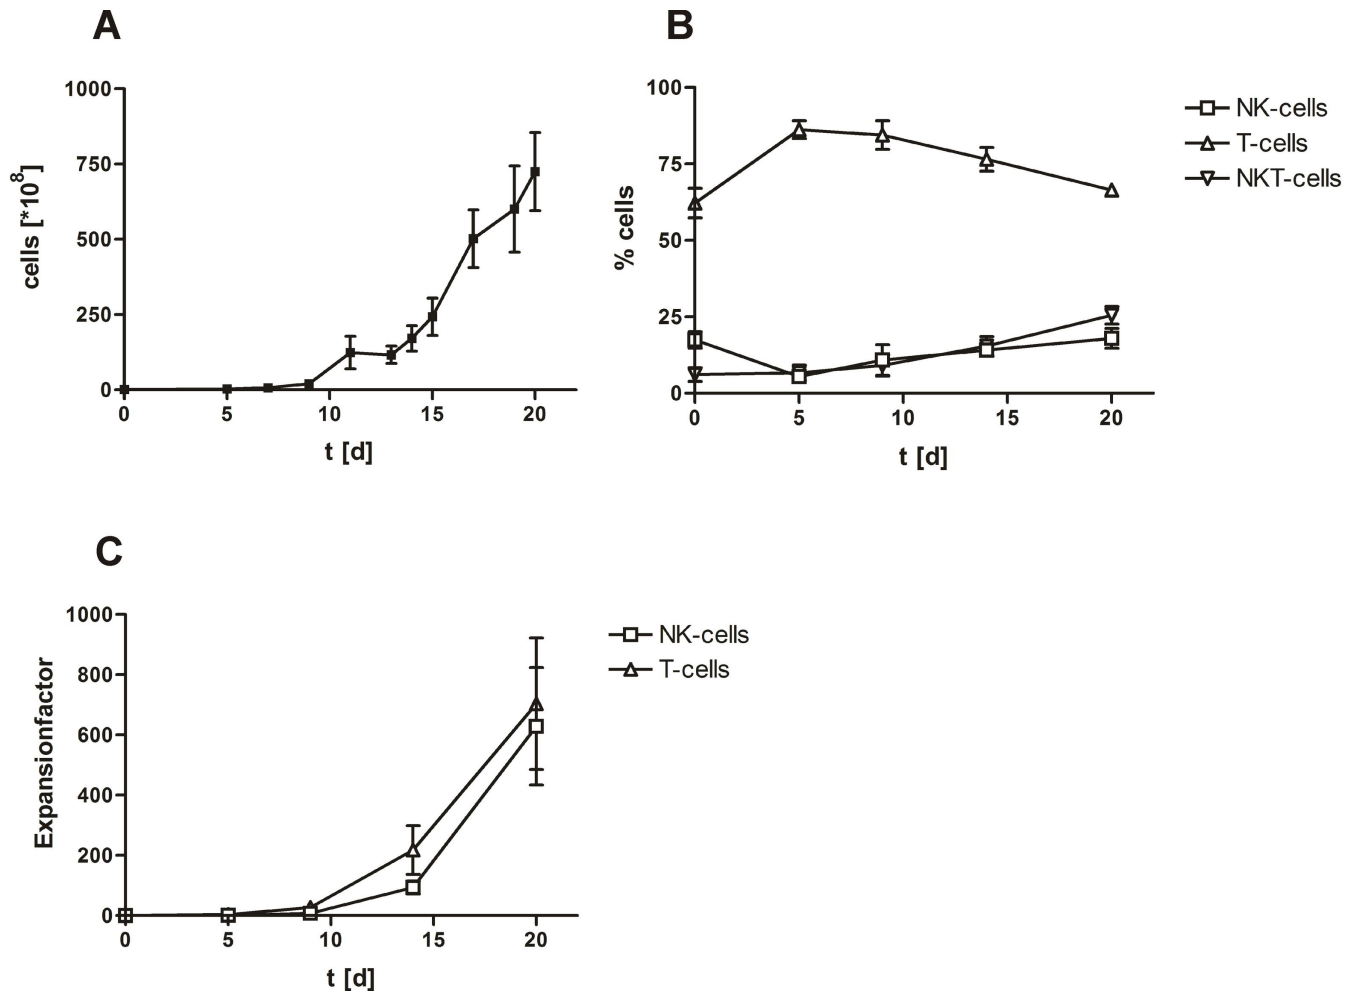

Supplement: mabs-6-286-s01.pdf [file mabs-6-286-s01.pdf]
